# Supplementary material for: The liposome–protein corona in mice and humans and its implications for in vivo delivery
Source: Royal Society of Chemistry journal article supplement (doi:10.1039/c4tb01316f), 2014-09-05
Supplement: c4tb01316f1.pdf [file c4tb01316f1.pdf]

|     | Common proteins                                                                    | RPA Mouse (%) | RPA Human (%) |
|-----|------------------------------------------------------------------------------------|---------------|---------------|
| 1   | A disintegrin and metalloproteinase with thrombospondin motifs 13                  | 0.031562157   | 0.06080607    |
| 2   | Alpha-1-acid glycoprotein 1                                                        | 0.059660176   | 0.020553802   |
| 3   | Alpha-1-antitrypsin                                                                | 0.90009       | 0.815155      |
| 4   | Alpha-1B-glycoprotein                                                              | 0.385174467   | 0.006090015   |
| 5   | Alpha-2-antiplasmin                                                                | 0.09328682    | 0.056803234   |
| 6   | Alpha-2-HS-glycoprotein                                                            | 0.361185928   | 0.286699182   |
| 7   | Alpha-2-macroglobulin                                                              | 0.271705378   | 0.190658577   |
| 8   | Angiopoietin-related protein 6                                                     | 0.247999161   | 0.129647056   |
| 9   | Angiotensinogen                                                                    | 0.009178489   | 0.217172244   |
| 10  | Antithrombin-III                                                                   | 0.068838664   | 0.012409842   |
| 11  | Apolipoprotein A-I                                                                 | 0.461885231   | 1.310139098   |
| 12  | Apolipoprotein A-II                                                                | 0.086778437   | 1.778838105   |
| 13  | Apolipoprotein A-IV                                                                | 0.477281405   | 0.763687918   |
| 14  | Apolipoprotein A-V                                                                 | 0.226999693   | 0.020052489   |
| 15  | Apolipoprotein C-II                                                                | 0.433892186   | 0.95668604    |
| 16  | Apolipoprotein C-III                                                               | 11.53068486   | 1.091220014   |
| 17  | Apolipoprotein E                                                                   | 0.937990539   | 1.42506358    |
| 18  | Apolipoprotein F                                                                   | 0.13355804    | 0.380538956   |
| 19  | Apolipoprotein M                                                                   | 0.11363843    | 0.297540747   |
| 20  | Bone morphogenetic protein 1                                                       | 0.088424903   | 0.007406775   |
| 21  | C-reactive protein                                                                 | 0.238640703   | 0.078926598   |
| 22  | C4b-binding protein                                                                | 0.302890122   | 4.449087296   |
| 23  | Cadherin-5                                                                         | 0.01762687    | 0.052318768   |
| 24  | Calreticulin                                                                       | 0.091976104   | 0.04795887    |
| 25  | Carboxypeptidase N catalytic chain                                                 | 0.208810615   | 0.025296987   |
| 26  | Carboxypeptidase N subunit 2                                                       | 0.175003182   | 0.091649738   |
| 27  | Cartilage oligomeric matrix protein                                                | 0.222634314   | 0.509139954   |
| 28  | CD5 antigen-like                                                                   | 0.183569771   | 0.506272588   |
| 29  | Ceruloplasmin                                                                      | 1.123189092   | 0.59707109    |
| 30  | Clusterin                                                                          | 0.933911211   | 1.612682897   |
| 31  | Coagulation factor IX                                                              | 0.475030078   | 0.828476312   |
| 32  | Coagulation factor V                                                               | 0.444432078   | 0.356918397   |
| 33  | Coagulation factor VIII                                                            | 0.391370752   | 0.309880806   |
| 34  | Coagulation factor X                                                               | 1.458359849   | 0.81019349    |
| 35  | Coagulation factor XIII A chain                                                    | 0.679982243   | 1.180279128   |
| 36  | Coagulation factor XIII B chain                                                    | 0.703362071   | 0.225010039   |
| 37  | Collagen alpha-1(XVIII) chain                                                      | 0.001311213   | 0.001847533   |
| 38  | Collectin-10                                                                       | 0.146263656   | 0.164430413   |
| 39  | Collectin-11                                                                       | 0.362075549   | 0.425251068   |
| 40  | Complement C1q subcomponent subunit A                                              | 0.220283725   | 0.347835566   |
| 41  | Complement C1q subcomponent subunit B                                              | 0.026515634   | 0.042841163   |
| 42  | Complement C1q subcomponent subunit C                                              | 0.091784886   | 0.271942606   |
| 43  | Complement C1r-A subcomponent                                                      | 0.439994      | 0.37819       |
| 44  | Complement C1s-A subcomponent                                                      | 0.92667       | 0.54881       |
| 45  | Complement C3                                                                      | 0.407998621   | 1.546701051   |
| 46  | Complement C4-B                                                                    | 0.604020638   | 1.248137591   |
| 47  | Complement component C8 beta chain                                                 | 0.010847305   | 0.36812779    |
| 48  | Complement component C8 gamma chain                                                | 0.010375683   | 0.545610007   |
| 49  | Complement component C9                                                            | 0.067358263   | 0.647281626   |
| 50  | Complement factor B                                                                | 0.042113065   | 0.149134561   |
| 51  | Complement factor H                                                                | 0.187993935   | 0.551255917   |
| 52  | Endoplasmic                                                                        | 0.060957136   | 0.04289489    |
| 53  | Endosialin                                                                         | 0.065480681   | 0.075110189   |
| 54  | Fibrinogen beta chain                                                              | 7.990124614   | 9.263892021   |
| 55  | Fibrinogen gamma chain                                                             | 5.374286026   | 4.698915265   |
| 56  | Fibrinogen-like protein 1                                                          | 0.304929787   | 0.041107603   |
| 57  | Fibronectin                                                                        | 0.255686467   | 0.330112147   |
| 58  | Gelsolin                                                                           | 0.326049797   | 0.934958977   |
| 59  | Growth arrest-specific protein 6                                                   | 0.01590938    | 0.00411076    |
| 60  | Haptoglobin                                                                        | 0.266176168   | 0.657721652   |
| 61  | Hemoglobin subunit alpha                                                           | 1.392070765   | 0.263088661   |
| 62  | Hemoglobin subunit beta                                                            | 4.138924685   | 0.493291239   |
| 63  | Hemopexin                                                                          | 0.140376884   | 0.022134863   |
| 64  | Heparin cofactor 2                                                                 | 0.844081003   | 0.940426573   |
| 65  | Histidine-rich glycoprotein                                                        | 0.056626607   | 0.238424099   |
| 66  | Hyaluronan-binding protein 2                                                       | 0.511922797   | 0.973532446   |
| 67  | Ig alpha chain C region                                                            | 0.1257701     | 1.018743477   |
| 68  | Ig gamma-2 chain C region                                                          | 0.267265534   | 0.429346079   |
| 69  | Ig gamma-3 chain C region                                                          | 0.010847305   | 0.878299036   |
| 70  | Ig kappa chain C region                                                            | 1.819635357   | 3.987437516   |
| 71  | Ig mu chain C region secreted form                                                 | 0.350801833   | 1.244973127   |
| 72  | Immunoglobulin J chain                                                             | 0.12549426    | 0.283185711   |
| 73  | Insulin-like growth factor-binding protein complex acid labile subunit             | 0.087264138   | 0.134533974   |
| 74  | Inter-alpha-trypsin inhibitor heavy chain H1                                       | 0.591876198   | 2.385055001   |
| 75  | Inter-alpha-trypsin inhibitor heavy chain H2                                       | 0.687780515   | 2.261693795   |
| 76  | Inter-alpha-trypsin inhibitor heavy chain H3                                       | 1.147403782   | 0.96356222    |
| 77  | Keratin, type II cytoskeletal 5                                                    | 0.007698087   | 0.010608414   |
| 78  | Kinogen-1                                                                          | 0.472377829   | 1.089351486   |
| 79  | Lipopolysaccharide-binding protein                                                 | 0.10356106    | 0.210967322   |
| 80  | Lumican                                                                            | 0.543221599   | 0.568832213   |
| 81  | Mannan-binding lectin serine protease 1                                            | 0.581686712   | 0.337186417   |
| 82  | Mannan-binding lectin serine protease 2                                            | 0.350111031   | 0.041107603   |
| 83  | N-acetylmuramoyl-L-alanine amidase                                                 | 0.020572474   | 0.066302586   |
| 84  | Nidogen-1                                                                          | 0.078385632   | 0.044734745   |
| 85  | Phospholipid transfer protein                                                      | 0.086175809   | 0.005979288   |
| 86  | Plasma kallikrein                                                                  | 0.04033364    | 0.004631843   |
| 87  | Plasma protease C1 inhibitor                                                       | 0.057529455   | 0.218244003   |
| 88  | Plasminogen                                                                        | 1.370217221   | 0.422821062   |
| 89  | Properdin                                                                          | 0.028636884   | 0.380446838   |
| 90  | Protein AMBP                                                                       | 0.666970169   | 1.846680023   |
| 91  | Protein disulfide-isomerase                                                        | 0.016746716   | 0.005769488   |
| 92  | Protein Z-dependent protease inhibitor                                             | 0.28912239    | 0.406239844   |
| 93  | Prothrombin                                                                        | 2.231290569   | 4.911771338   |
| 94  | Secreted phosphoprotein 24                                                         | 0.264579909   | 0.274050688   |
| 95  | Selenoprotein P                                                                    | 0.049948054   | 0.06118341    |
| 96  | Serotransferrin                                                                    | 0.404449502   | 0.219952371   |
| 97  | Serum albumin                                                                      | 1.390341484   | 1.506087262   |
| 98  | Serum amyloid A-1 protein                                                          | 0.30682376    | 0.293625738   |
| 99  | Serum amyloid A-4 protein                                                          | 0.278414153   | 0.471367184   |
| 100 | Serum paraoxonase/arylesterase 1                                                   | 1.512385452   | 2.174592213   |
| 101 | SPARC-like protein 1                                                               | 0.415964002   | 0.252126633   |
| 102 | Sushi, von Willebrand factor type A, EGF and pentraxin domain-containing protein 1 | 0.008324676   | 0.001686466   |
| 103 | Thrombospondin-1                                                                   | 0.652590537   | 0.098148386   |
| 104 | Thrombospondin-4                                                                   | 0.293798223   | 0.209416092   |
| 105 | Transthyretin                                                                      | 0.26847079    | 1.058520784   |
| 106 | Tubulin beta-1 chain                                                               | 0.140798015   | 0.078926598   |
| 107 | Tubulin beta-2A chain                                                              | 0.484440626   | 0.01973165    |
| 108 | Vitamin D-binding protein                                                          | 0.072917992   | 0.012409842   |
| 109 | Vitamin K-dependent protein C                                                      | 0.516289981   | 0.521750349   |
| 110 | Vitamin K-dependent protein S                                                      | 0.378643248   | 1.484258528   |
| 111 | Vitamin K-dependent protein Z                                                      | 1.412861432   | 0.456751147   |
| 112 | Vitronectin                                                                        | 1.1435305911  | 2.222855584   |
| 113 | von Willebrand factor                                                              | 0.01351525    | 0.054278      |

| Mouse | RPA (%)      | Human                                         | RPA (%)     |
|-------|--------------|-----------------------------------------------|-------------|
| 1     | 0.156530805  | ADAMTS-like protein 2                         | 0.018792047 |
| 2     | 0.068183058  | Alpha-1-acid glycoprotein 2                   | 0.102769008 |
| 3     | 0.251425026  | Alpha-1-antichymotrypsin                      | 0.102769008 |
| 4     | 0.200287733  | Apolipoprotein B-100                          | 0.520696308 |
| 5     | 0.30682376   | Apolipoprotein C-I                            | 0.383670964 |
| 6     | 0.005077462  | Apolipoprotein D                              | 0.336690846 |
| 7     | 0.005549784  | Apolipoprotein L1                             | 0.142008084 |
| 8     | 0.083162669  | Apolipoprotein(a)                             | 0.080410082 |
| 9     | 0.021694609  | Beta-Ala-His dipeptidase                      | 0.525023424 |
| 10    | 0.198867252  | Cadherin-13                                   | 0.012648493 |
| 11    | 0.005077462  | Cadherin-6                                    | 0.033633494 |
| 12    | 0.169305904  | Cartilage acidic protein 1                    | 0.152850806 |
| 13    | 0.069946413  | CD9 antigen                                   | 0.013154433 |
| 14    | 0.019886725  | Coagulation factor VIII                       | 0.008005975 |
| 15    | 0.30682376   | Complement C5                                 | 0.299998041 |
| 16    | 0.09910744   | Complement component C6                       | 0.2787487   |
| 17    | 0.137218404  | Complement component C7                       | 0.267636736 |
| 18    | 1.67590857   | Complement component C8 alpha chain           | 0.437637869 |
| 19    | 0.692058037  | Complement factor H-related protein 1         | 0.281262549 |
| 20    | 0.484897598  | Complement factor H-related protein 5         | 0.015415351 |
| 21    | 0.077696973  | Complement factor I                           | 0.044844658 |
| 22    | 0.02386407   | Dermatopontin                                 | 0.068512672 |
| 23    | 0.0005996    | Dermeidin                                     | 0.029896439 |
| 24    | 0.033654458  | Desmocollin-2                                 | 0.013154433 |
| 25    | 0.426144112  | Desmoglein-2                                  | 0.002695581 |
| 26    | 0.425402992  | Extracellular superoxide dismutase [Cu-Zn]    | 0.044269727 |
| 27    | 0.25491166   | Fibrinogen alpha chain                        | 2.752045861 |
| 28    | 0.25491166   | Fibulin-1                                     | 0.140940354 |
| 29    | 0.498588611  | Ficolin-3                                     | 0.064775617 |
| 30    | 0.736673473  | Filamin-A                                     | 0.001170323 |
| 31    | 0.298300878  | Galectin-3-binding protein                    | 0.07589096  |
| 32    | 0.312505682  | Glicosylase 2 subunit beta                    | 0.039017386 |
| 33    | 0.319890091  | Haptoglobin-related protein                   | 0.497507404 |
| 34    | 0.091316595  | Hornerin                                      | 0.012244818 |
| 35    | 0.526413314  | Ig gamma-1 chain C region                     | 1.224093075 |
| 36    | 0.005966018  | Ig gamma-4 chain C region                     | 0.849557134 |
| 37    | 0.149150439  | Ig heavy chain V-III region BRO               | 0.025296987 |
| 38    | 0.127144637  | Ig heavy chain V-III region VH26              | 0.328860826 |
| 39    | 0.009740437  | Ig kappa chain V-I region AG                  | 0.082215207 |
| 40    | 0.309773989  | Ig kappa chain V-I region EU                  | 0.068512672 |
| 41    | 0.115471308  | Ig kappa chain V-II region RPM1 6410          | 0.021924055 |
| 42    | 0.009178489  | Ig kappa chain V-II region TEW                | 0.054810138 |
| 43    | 0.045076577  | Ig kappa chain V-III region HAH               | 0.352350885 |
| 44    | 0.013335804  | Ig kappa chain V-III region VG (Fragment)     | 0.025296987 |
| 45    | 0.048419853  | Ig kappa chain V-IV region (Fragment)         | 0.1897274   |
| 46    | 1.346615393  | Ig lambda chain V-I region HA                 | 0.137025344 |
| 47    | 0.049948054  | Ig lambda chain V-III region LOI              | 0.054810138 |
| 48    | 0.182294981  | Ig lambda chain V-III region LOI              | 1.763889885 |
| 49    | 0.003509422  | Ig mu heavy chain disease protein             | 1.181604596 |
| 50    | 0.018356977  | Immunoglobulin lambda-like polypeptide 5      | 0.164430413 |
| 51    | 0.10356106   | Integrin alpha-IIb                            | 0.037833546 |
| 52    | 0.066007003  | Integrin beta-3                               | 0.007560019 |
| 53    | 0.093219024  | Intelectin-1                                  | 0.173826437 |
| 54    | 0.188400555  | Inter-alpha-trypsin inhibitor heavy chain H4  | 0.054278    |
| 55    | 0.005187841  | Kaillitatin                                   | 0.046980118 |
| 56    | 0.05209955   | Keratin, type I cytoskeletal 10               | 0.498865151 |
| 57    | 0.081137839  | Keratin, type I cytoskeletal 14               | 0.14229555  |
| 58    | 0.014318442  | Keratin, type I cytoskeletal 9                | 0.389859205 |
| 59    | 0.032039724  | Keratin, type II cytoskeletal 1               | 0.652738912 |
| 60    | 0.064848017  | Keratin, type II cytoskeletal 2 epidermal     | 0.394632991 |
| 61    | 0.364979898  | Lysozyme C                                    | 0.019344754 |
| 62    | 0.013257817  | Macrophage receptor MARCO                     | 0.037229527 |
| 63    | 0.248186331  | Out at first protein homolog                  | 0.021216827 |
| 64    | 0.099432626  | Pigment epithelium-derived factor             | 0.06791691  |
| 65    | 0.238640703  | Platelet glycoprotein Ib alpha chain          | 0.040511841 |
| 66    | 0.034091529  | Proprotein convertase subtilisin/kexin type 9 | 0.033330489 |
| 67    | 0.011363843  | Proteoglycan 4                                | 0.002177886 |
| 68    | 0.076161926  | Ras-related protein Rap-1b                    | 0.156600393 |
| 69    | 0.030792349  | Serum paraoxonase/lactonase 3                 | 0.069882926 |
| 70    | 0.343642612  | Talin-1                                       | 0.020706052 |
| 71    | 0.523683764  | Tropomyosin alpha-4 chain                     | 0.034020085 |
| 72    | 0.0509660176 |                                               |             |
| 73    | 0.203838933  |                                               |             |
| 74    | 0.113499846  |                                               |             |
| 75    | 0.583702259  |                                               |             |
| 76    | 0.083005462  |                                               |             |
| 77    | 0.140376884  |                                               |             |
| 78    | 0.186887297  |                                               |             |
| 79    | 0.052333487  |                                               |             |
| 80    | 0.021056533  |                                               |             |
| 81    | 0.076365025  |                                               |             |
| 82    | 0.206098789  |                                               |             |
| 83    | 0.088855581  |                                               |             |
| 84    | 1.123831216  |                                               |             |
| 85    | 0.110141863  |                                               |             |
| 86    | 0.045892443  |                                               |             |
| 87    | 0.146855817  |                                               |             |
| 88    | 0.03181876   |                                               |             |
| 89    | 0.01590938   |                                               |             |
| 90    | 0.308244241  |                                               |             |
| 91    | 0.348017691  |                                               |             |
| 92    | 0.091784886  |                                               |             |
| 93    | 0.028292454  |                                               |             |
| 94    | 0.003008076  |                                               |             |
| 95    | 0.260335312  |                                               |             |
| 96    | 0.011363843  |                                               |             |
| 97    | 0.008730757  |                                               |             |
| 98    | 0.083299113  |                                               |             |
| 99    | 0.054769997  |                                               |             |
| 100   | 0.340915289  |                                               |             |
| 101   | 0.02386407   |                                               |             |
| 102   | 1.541986078  |                                               |             |
| 103   | 0.003269051  |                                               |             |
| 104   | 0.069603538  |                                               |             |
| 105   | 0.138622173  |                                               |             |
| 106   | 0.205375635  |                                               |             |
| 107   | 0.044192723  |                                               |             |
| 108   | 0.049131909  |                                               |             |
| 109   | 0.011932035  |                                               |             |
| 110   | 0.002005384  |                                               |             |
| 111   | 0.011151435  |                                               |             |
| 112   | 0.013507964  |                                               |             |
| 113   | 0.071592211  |                                               |             |
| 114   | 0.063822513  |                                               |             |
| 115   | 0.049529202  |                                               |             |
| 116   | 0.108473047  |                                               |             |
| 117   | 0.031127048  |                                               |             |
| 118   | 0.202844597  |                                               |             |
| 119   | 0.723752253  |                                               |             |
| 120   | 0.16270957   |                                               |             |
| 121   | 0.018356977  |                                               |             |
| 122   | 0.014610655  |                                               |             |
| 123   | 0.03181876   |                                               |             |
| 124   | 0.014037688  |                                               |             |
| 125   | 0.100480296  |                                               |             |
| 126   | 0.03977345   |                                               |             |
| 127   | 0.143184422  |                                               |             |
| 128   | 0.119320351  |                                               |             |
| 129   | 0.018356977  |                                               |             |

|     |                                           |             |
|-----|-------------------------------------------|-------------|
| 130 | Prothymosin alpha                         | 0.26847079  |
| 131 | Protocadherin-12                          | 0.008324676 |
| 132 | Putromycin-sensitive aminopeptidase       | 0.00579225  |
| 133 | Reelin                                    | 0.015724387 |
| 134 | Secretoglobin family 2B member 2          | 0.19274826  |
| 135 | Serine protease inhibitor A3K             | 0.48997506  |
| 136 | Serine protease inhibitor A3N             | 0.253873088 |
| 137 | Serine/threonine-protein phosphatase 2A   | 0.027535466 |
| 138 | Serum amyloid A-2 protein                 | 0.170457645 |
| 139 | Serum amyloid P-component                 | 0.091784886 |
| 140 | SPARC                                     | 0.031584799 |
| 141 | Sulfated glycoprotein 1                   | 0.240596774 |
| 142 | Sulphydryl oxidase 1                      | 0.090568459 |
| 143 | Suprabasin                                | 0.013257817 |
| 144 | Tenascin                                  | 0.00565743  |
| 145 | Transferrin receptor protein 1            | 0.219216459 |
| 146 | Transforming protein RhoA                 | 0.097625742 |
| 147 | Transitional endoplasmic reticulum ATPase | 0.26143223  |
| 148 | Tubulin alpha-1A chain                    | 0.360347461 |
| 149 | Tubulin alpha-1B chain                    | 0.360347461 |
| 150 | Tubulin alpha-4A chain                    | 0.031023291 |
| 151 | Tubulin beta-4A chain                     | 0.198071783 |
| 152 | Tubulin beta-4B chain                     | 0.46534937  |
| 153 | Tubulin beta-5 chain                      | 0.52978236  |
| 154 | Tubulin beta-6 chain                      | 0.021477663 |
| 155 | Ubiquitin carboxyl-terminal hydrolase 5   | 0.047230972 |
| 156 | Ubiquitin-conjugating enzyme E2 O         | 0.00930868  |
| 157 | Uncharacterized protein C5orf46 homolog   | 0.250572738 |
| 158 | Vesicle-fusing ATPase                     | 0.002875189 |

**Table S1.** The full list of all the plasma proteins adhering on PEGylated DOTAP liposomes after 1 h incubation with both MP and HP as identified by NanoLC-MS/MS.

|     | Common proteins                                                        | RPA Mouse (%) | RPA Human (%) |
|-----|------------------------------------------------------------------------|---------------|---------------|
| 1   | 14-3-3 protein zeta/delta                                              | 0.02339714    | 0.028506309   |
| 2   | 78 kDa glucose-regulated protein                                       | 0.054593327   | 0.022171573   |
| 3   | Actin, cytoplasmic I                                                   | 0.56933041    | 0.237525272   |
| 4   | Aflamin                                                                | 0.0442725212  | 0.011567777   |
| 5   | Alpha-1-acid glycoprotein 1                                            | 0.109186654   | 0.515488081   |
| 6   | Alpha-1-antitrypsin                                                    | 1.509624173   | 0.815159123   |
| 7   | Alpha-1B-glycoprotein                                                  | 0.149413316   | 0.162591538   |
| 8   | Alpha-2-antiplasmin                                                    | 0.184624706   | 0.079817664   |
| 9   | Alpha-2-HS-glycoprotein                                                | 0.841032335   | 0.521884727   |
| 10  | Alpha-2-macroglobulin                                                  | 0.65906643    | 0.34032685    |
| 11  | Angiotensinogen                                                        | 0.01889769    | 0.173189271   |
| 12  | Antithrombin-III                                                       | 0.182677671   | 0.12809461    |
| 13  | Apolipoprotein A-I                                                     | 1.405337901   | 1.441867482   |
| 14  | Apolipoprotein A-II                                                    | 0.506229032   | 1.052141937   |
| 15  | Apolipoprotein A-IV                                                    | 0.81526035    | 0.798176642   |
| 16  | Apolipoprotein B-100                                                   | 0.180190156   | 0.61951501    |
| 17  | Apolipoprotein C-I                                                     | 0.622363928   | 0.310402027   |
| 18  | Apolipoprotein C-II                                                    | 0.506229032   | 0.689334372   |
| 19  | Apolipoprotein C-III                                                   | 2.531145161   | 0.725615129   |
| 20  | Apolipoprotein C-IV                                                    | 0.210574261   | 0.079817664   |
| 21  | Apolipoprotein D                                                       | 0.148890892   | 0.342075704   |
| 22  | Apolipoprotein E                                                       | 1.401228726   | 0.897948722   |
| 23  | Apolipoprotein F                                                       | 0.077072932   | 0.182440375   |
| 24  | Apolipoprotein M                                                       | 0.327559962   | 0.057012617   |
| 25  | Beta-2-glycoprotein 1                                                  | 0.453544563   | 0.042009297   |
| 26  | C4b-binding protein                                                    | 0.201575361   | 3.656040449   |
| 27  | Carboxypeptidase N subunit 2                                           | 0.131023985   | 0.032712157   |
| 28  | Cartilage oligomeric matrix protein                                    | 0.103860476   | 0.6587361444  |
| 29  | CD44 antigen                                                           | 0.007617674   | 0.014600792   |
| 30  | CD5 antigen-like                                                       | 0.755907605   | 0.672148751   |
| 31  | Ceruloplasmin                                                          | 0.63075596    | 0.624802207   |
| 32  | Clusterin                                                              | 0.497639173   | 0.575608155   |
| 33  | Coagulation factor IX                                                  | 0.173050546   | 0.445136973   |
| 34  | Coagulation factor V                                                   | 0.128636908   | 0.015836838   |
| 35  | Coagulation factor VIII                                                | 0.19635977    | 0.053723428   |
| 36  | Coagulation factor X                                                   | 0.41854884    | 0.261221446   |
| 37  | Collectin-11                                                           | 0.158132395   | 0.261471658   |
| 38  | Complement C1q subcomponent subunit A                                  | 0.491339943   | 0.475836075   |
| 39  | Complement C1q subcomponent subunit B                                  | 0.400351065   | 0.753833495   |
| 40  | Complement C1q subcomponent subunit C                                  | 0.478741483   | 0.368389219   |
| 41  | Complement C1r-A subcomponent                                          | 0.221102974   | 0.419042737   |
| 42  | Complement C1s-A subcomponent                                          | 0.089334535   | 0.632321755   |
| 43  | Complement C3                                                          | 0.94921946    | 2.20445892    |
| 44  | Complement C4-B                                                        | 0.41581446    | 1.579810762   |
| 45  | Complement C5                                                          | 0.04679428    | 0.275965328   |
| 46  | Complement component C8 alpha chain                                    | 0.074445446   | 0.38066886    |
| 47  | Complement component C8 beta chain                                     | 0.079408476   | 0.411001405   |
| 48  | Complement component C8 gamma chain                                    | 0.1139339     | 0.580492103   |
| 49  | Complement component C9                                                | 0.137363855   | 0.671481937   |
| 50  | Complement factor B                                                    | 0.188828684   | 0.171700789   |
| 51  | Complement factor H                                                    | 0.737599061   | 0.992414094   |
| 52  | Complement factor I                                                    | 0.229780869   | 0.108842269   |
| 53  | Corticosteroid-binding globulin                                        | 0.087349323   | 0.017737259   |
| 54  | C-reactive protein                                                     | 0.17033118    | 0.11174473    |
| 55  | Endoplasmic                                                            | 0.053406516   | 0.069406664   |
| 56  | Fetuin-B                                                               | 0.114265103   | 0.019004206   |
| 57  | Fibrinogen beta chain                                                  | 4.550105654   | 3.164200258   |
| 58  | Fibrinogen gamma chain                                                 | 2.43302575    | 1.696125364   |
| 59  | Fibronectin                                                            | 0.415149256   | 0.463821057   |
| 60  | Fibulin-1                                                              | 0.0629923     | 0.228050469   |
| 61  | Filamin-A                                                              | 0.018651101   | 0.012782188   |
| 62  | Galectin-3-binding protein                                             | 0.030708746   | 0.251732633   |
| 63  | Gelsolin                                                               | 0.597987372   | 0.542945739   |
| 64  | Glutathione peroxidase 3                                               | 0.43237915    | 0.030699102   |
| 65  | Glyceraldehyde-3-phosphate dehydrogenase                               | 0.291164411   | 0.09977208    |
| 66  | Haptoglobin                                                            | 0.310762015   | 0.700621719   |
| 67  | Hemoglobin subunit alpha                                               | 1.746986464   | 0.585329537   |
| 68  | Hemoglobin subunit beta                                                | 5.629936846   | 0.573689461   |
| 69  | Hemopexin                                                              | 0.449592105   | 0.18419461    |
| 70  | Heparin cofactor 2                                                     | 0.042461477   | 0.336074375   |
| 71  | Histidine-rich glycoprotein                                            | 0.227626414   | 0.239452993   |
| 72  | Hyaluronan-binding protein 2                                           | 0.987963111   | 1.501332255   |
| 73  | Ig alpha chain C region                                                | 1.372210652   | 1.264536607   |
| 74  | Ig gamma-1 chain C region                                              | 0.670355271   | 1.718296937   |
| 75  | Ig gamma-2 chain C region                                              | 2.99292841    | 0.831434002   |
| 76  | Ig gamma-3 chain C region                                              | 0.543451755   | 1.216732686   |
| 77  | Ig kappa chain C region                                                | 3.139116302   | 7.615935456   |
| 78  | Ig lambda-2 chain C region                                             | 0.506229032   | 1.560072527   |
| 79  | Ig mu chain C region                                                   | 2.417392519   | 1.67779988    |
| 80  | Immunoglobulin J chain                                                 | 0.764306578   | 0.576460908   |
| 81  | Insulin-like growth factor-binding protein complex acid labile subunit | 0.009777909   | 0.018140378   |
| 82  | Integrin alpha-1Ib                                                     | 0.026088847   | 0.010595265   |
| 83  | Integrin beta-3                                                        | 0.052170798   | 0.036697777   |
| 84  | Inter-alpha-trypsin inhibitor, heavy chain 4                           | 0.548095382   | 2.734347703   |
| 85  | Inter-alpha-trypsin inhibitor heavy chain H1                           | 0.531512391   | 2.646783864   |
| 86  | Inter-alpha-trypsin inhibitor heavy chain H2                           | 0.622033059   | 0.870012539   |
| 87  | Inter-alpha-trypsin inhibitor heavy chain H3                           | 0.141189639   | 0.656128256   |
| 88  | Keratin, type I cytoskeletal 10                                        | 0.142148663   | 0.291641465   |
| 89  | Keratin, type I cytoskeletal 14                                        | 0.125984601   | 0.266058881   |
| 90  | Keratin, type I cytoskeletal 16                                        | 0.1836321     | 1.100516279   |
| 91  | Keratin, type II cytoskeletal 1                                        | 0.129178577   | 0.658020954   |
| 92  | Keratin, type II cytoskeletal 2 epidermal                              | 0.327559962   | 0.270350153   |
| 93  | Keratin, type II cytoskeletal 5                                        | 0.283145052   | 0.292664769   |
| 94  | Keratin, type II cytoskeletal 6A                                       | 0.601274451   | 0.559832228   |
| 95  | Kinogen-1                                                              | 0.135968286   | 0.09035962    |
| 96  | Lipopolysaccharide-binding protein                                     | 0.08619999    | 0.105023242   |
| 97  | Lumican                                                                | 0.069606492   | 0.085879765   |
| 98  | Mannan-binding lectin serine protease 1                                | 0.428347643   | 0.061398203   |
| 99  | Mannose-binding protein C                                              | 0.016942757   | 0.16092271    |
| 100 | N-acetylmuramoyl-L-alanine amidase                                     | 0.005505209   | 0.063013945   |
| 101 | Neural cell adhesion molecule 1                                        | 0.045858395   | 0.015965333   |
| 102 | Phosphatidylcholine-sterol acyltransferase                             | 0.049846081   | 0.164840828   |
| 103 | Pigment epithelium-derived factor                                      | 0.184540824   | 0.067451547   |
| 104 | Plasma kallikrein                                                      | 0.152081411   | 0.653053616   |
| 105 | Plasma protease C1 inhibitor                                           | 1.68819365    | 0.495571212   |
| 106 | Plasminogen                                                            | 0.08598449    | 0.011567777   |
| 107 | Platelet glycoprotein Ib alpha chain                                   | 0.275150368   | 0.563418806   |
| 108 | Properdin                                                              | 1.226250114   | 1.708916656   |
| 109 | Protein AMBP                                                           | 0.010910586   | 0.313010448   |
| 110 | Protein Z-dependent protease inhibitor                                 | 0.97332103    | 5.427601164   |
| 111 | Prothrombin                                                            | 0.085450425   | 0.138813329   |
| 112 | Retinol-binding protein 4                                              | 1.012458064   | 0.559760242   |
| 113 | Serotransferrin                                                        | 4.372213405   | 2.943999352   |
| 114 | Serum albumin                                                          | 0.567770601   | 0.425694209   |
| 115 | Serum amyloid A-4 protein                                              | 0.264567662   | 0.127708263   |
| 116 | Serum amyloid P-component                                              | 0.532284938   | 0.409065529   |
| 117 | Serum paraoxonase/arylesterase 1                                       | 0.064298807   | 0.011824839   |
| 118 | Talin-1                                                                | 0.982679886   | 0.139216856   |
| 119 | Thrombospondin-1                                                       | 0.343010904   | 0.214604097   |
| 120 | Thrombospondin-4                                                       | 0.573229933   | 0.648518521   |
| 121 | Transferrin                                                            | 0.245669971   | 0.371564988   |
| 122 | Tropomyosin alpha-4 chain                                              | 0.11721586    | 0.071835898   |
| 123 | Tubulin alpha-4A chain                                                 | 0.624790298   | 0.173189271   |
| 124 | Vitamin D-binding protein                                              | 0.497639173   | 0.353039668   |
| 125 | Vitamin K-dependent protein C                                          | 0.069879459   | 1.016344924   |
| 126 | Vitamin K-dependent protein S                                          | 0.8263445     | 0.68288446    |
| 127 | Vitamin K-dependent protein Z                                          | 1.971315408   | 4.079569502   |
| 128 | Vitronectin                                                            | 0.346277674   | 0.302222224   |

|     | Mouse                                                                | RPA (%)     | Human                                                              | RPA (%)     |
|-----|----------------------------------------------------------------------|-------------|--------------------------------------------------------------------|-------------|
| 1   | 60S acidic ribosomal protein P1                                      | 0.059556357 | Aggrecan core protein                                              | 0.00478906  |
| 2   | 60S acidic ribosomal protein P2                                      | 0.08188999  | Alpha-1-acid glycoprotein 2                                        | 0.09977208  |
| 3   | 60S ribosomal protein L30                                            | 0.07559076  | Alpha-1-antichymotrypsin                                           | 0.365830961 |
| 4   | 60S ribosomal protein L7                                             | 0.021132901 | Angiopoietin-related protein 6                                     | 0.030699102 |
| 5   | Acidic leucine-rich nuclear phosphoprotein 32 family member A        | 0.056475856 | Apolipoprotein L1                                                  | 0.226754728 |
| 6   | Actin, alpha skeletal muscle                                         | 0.444545663 | Apolipoprotein(a)                                                  | 0.160909862 |
| 7   | Alpha-enolase                                                        | 0.111509774 | Beta-Ala-His dipeptidase                                           | 0.01662868  |
| 8   | Alpha-synuclein                                                      | 0.093588561 | Calreticulin                                                       | 1.536386645 |
| 9   | Antileukoprotease                                                    | 0.04679428  | Complement C4-A                                                    | 0.212847104 |
| 10  | Apolipoprotein A-V                                                   | 0.015978535 | Complement component C6                                            | 0.186807299 |
| 11  | ATP synthase subunit alpha, mitochondrial                            | 0.010918665 | Complement component C7                                            | 0.420092969 |
| 12  | ATP synthase subunit beta, mitochondrial                             | 0.01169857  | Complement factor H-related protein 1                              | 0.09977208  |
| 13  | Band 3 anion transport protein                                       | 0.047702907 | Complement factor H-related protein 5                              | 0.108842269 |
| 14  | Barrier-to-autointegration factor                                    | 0.294803966 | Dermeidin                                                          | 1.243475189 |
| 15  | Basement membrane-specific heparan sulfate proteoglycan core protein | 0.00658412  | Fibrinogen alpha chain                                             | 0.019310725 |
| 16  | Beta-2-microglobulin                                                 | 0.163779981 | Filaggrin-2                                                        | 0.027056835 |
| 17  | Bighlycin                                                            | 0.038995234 | Glucosylase 2 subunit beta                                         | 0.542330795 |
| 18  | BPI fold-containing family A member 2                                | 0.196535977 | Haptoglobin-related protein                                        | 0.050947445 |
| 19  | Carboxylesterase 1C                                                  | 0.171834734 | Hornerin                                                           | 0.23280152  |
| 20  | Carboxypeptidase N catalytic chain                                   | 0.220473051 | Ig gamma-4 chain C region                                          | 0.276291914 |
| 21  | Carboxypeptidase Q                                                   | 0.05039384  | Ig heavy chain V-III region BUT                                    | 0.460486524 |
| 22  | Catalase                                                             | 0.010918665 | Ig heavy chain V-III region GAL                                    | 0.13302944  |
| 23  | Cathelin-related antimicrobial peptide                               | 0.131023985 | Ig heavy chain V-III region VH26                                   | 0.122796406 |
| 24  | Clathrin heavy chain 1                                               | 0.018766456 | Ig heavy chain V-III region WEA                                    | 0.266058881 |
| 25  | Coagulation factor XII                                               | 0.054593327 | Ig kappa chain V4 region HK102 (Fragment)                          | 0.06651472  |
| 26  | Coagulation factor XIII A chain                                      | 0.063144089 | Ig kappa chain V4 region WEA                                       | 0.484607247 |
| 27  | Coagulation factor XIII B chain                                      | 0.133609884 | Ig kappa chain V-III region B6                                     | 0.153495508 |
| 28  | Collagen alpha-1(XII) chain                                          | 0.00578047  | Ig kappa chain V-III region HAH                                    | 0.399088321 |
| 29  | Complement factor D                                                  | 0.584928504 | Ig kappa chain V-III region VG (Fragment)                          | 0.22557166  |
| 30  | Creatine kinase M-type                                               | 0.152353471 | Ig kappa chain V-IV region (Fragment)                              | 0.097735915 |
| 31  | C-type lectin domain family 11 member A                              | 0.045494439 | Ig lambda chain V-I region HA                                      | 0.720933741 |
| 32  | Decorin                                                              | 0.221102974 | Immunoglobulin lambda-like polypeptide 5                           | 0.258233619 |
| 33  | Desmoplakin                                                          | 0.001967327 | Kallistatin                                                        | 0.039908832 |
| 34  | Dickkopf-related protein 3                                           | 0.034479996 | Keratin, type I cytoskeletal 9                                     | 0.04988604  |
| 35  | EGF-containing fibulin-like extracellular matrix protein 1           | 0.083378899 | Lysozyme C                                                         | 0.50793059  |
| 36  | Elongation factor 1-alpha 1                                          | 0.013102398 | Monocyte differentiation antigen CD14                              | 0.217684539 |
| 37  | EMILIN-1                                                             | 0.006065925 | Procollagen C-endopeptidase enhancer 1                             | 0.18419461  |
| 38  | Epidermal growth factor receptor                                     | 0.00485274  | Protein S100-A7                                                    | 0.013214845 |
| 39  | Epidermal growth factor-binding protein type B                       | 0.045180684 | Protein S100-A8                                                    | 0.23280152  |
| 40  | Erythrocyte band 7 integral membrane protein                         | 0.042265802 | Protein S100-A9                                                    | 0.057012617 |
| 41  | Extracellular matrix protein 1                                       | 0.036395551 | Proteoglycan 4                                                     | 0.085518926 |
| 42  | Ficolin-1                                                            | 0.109186654 | Secreted phosphoprotein 24                                         | 0.014424879 |
| 43  | Glycosylation-dependent cell adhesion molecule 1                     | 0.040944995 | Serum amyloid A-1 protein                                          | 0.009461146 |
| 44  | H-2 class I histocompatibility antigen, Q10 alpha chain              | 0.336412934 | Serum amyloid A-2 protein                                          | 0.108490029 |
| 45  | Heat shock cognate 71 kDa protein                                    | 0.055362247 | Soluble scavenger receptor cysteine-rich domain-containing protein | 0.056012396 |
| 46  | Heat shock protein HSP 90-alpha                                      | 0.026975526 | Tenascin-X                                                         | 0.864691362 |
| 47  | Histone H2B type 1-B                                                 | 0.04679428  | von Willebrand factor                                              | 0.06651472  |
| 48  | Histone H3 2                                                         | 0.109186654 |                                                                    |             |
| 49  | Histone H4                                                           | 0.476450854 |                                                                    |             |
| 50  | Ig heavy chain V region 3-45                                         | 0.503938403 |                                                                    |             |
| 51  | Ig heavy chain V region 3-6                                          | 0.07559076  |                                                                    |             |
| 52  | Ig heavy chain V region 4-41                                         | 0.503938403 |                                                                    |             |
| 53  | Ig heavy chain V region 5-84                                         | 0.453544563 |                                                                    |             |
| 54  | Ig heavy chain V region 6-96                                         | 0.714676281 |                                                                    |             |
| 55  | Ig heavy chain V region 9-14                                         | 0.17866907  |                                                                    |             |
| 56  | Ig heavy chain V region AC38 205.12                                  | 0.831498365 |                                                                    |             |
| 57  | Ig heavy chain V region B1-8/186-2                                   | 0.305722631 |                                                                    |             |
| 58  | Ig heavy chain V region M                                            | 0.05039384  |                                                                    |             |
| 59  | Ig heavy chain V region M                                            | 0.201575361 |                                                                    |             |
| 60  | Ig heavy chain V region M                                            | 0.349397293 |                                                                    |             |
| 61  | Ig heavy chain V region MCI101                                       | 0.403150722 |                                                                    |             |
| 62  | Ig heavy chain V region PJ14                                         | 0.136483317 |                                                                    |             |
| 63  | Ig heavy chain V region VH55 A1/A4                                   | 0.07559076  |                                                                    |             |
| 64  | Ig heavy chain V regions TEPC 15/S107/HPCM1/HPCM2/HPCM3              | 0.533142223 |                                                                    |             |
| 65  | Ig heavy chain V-III region J606                                     | 0.755907605 |                                                                    |             |
| 66  | Ig kappa chain V19-17                                                | 0.225197474 |                                                                    |             |
| 67  | Ig kappa chain V-I region S107A                                      | 0.251969202 |                                                                    |             |
| 68  | Ig kappa chain V-II region 26-10                                     | 0.737009914 |                                                                    |             |
| 69  | Ig kappa chain V-II region 7S34.1                                    | 0.272966635 |                                                                    |             |
| 70  | Ig kappa chain V-II region VKappa167                                 | 0.251969202 |                                                                    |             |
| 71  | Ig kappa chain V-III region CBPC 101                                 | 0.272966635 |                                                                    |             |
| 72  | Ig kappa chain V-III region PC 2880/PC 1229                          | 0.163779981 |                                                                    |             |
| 73  | Ig kappa chain V-III region PC 6684                                  | 0.491339943 |                                                                    |             |
| 74  | Ig kappa chain V-IV region S107B                                     | 0.187177121 |                                                                    |             |
| 75  | Ig kappa chain V-V region HP R16.7                                   | 0.518636606 |                                                                    |             |
| 76  | Ig kappa chain V-V region K2 (Fragment)                              | 0.453544563 |                                                                    |             |
| 77  | Ig kappa chain V-V region L6 (Fragment)                              | 0.352756882 |                                                                    |             |
| 78  | Ig kappa chain V-V region L7 (Fragment)                              | 0.151181521 |                                                                    |             |
| 79  | Ig kappa chain V-V region M                                          | 0.272966635 |                                                                    |             |
| 80  | Ig kappa chain V-V region M                                          | 0.421148523 |                                                                    |             |
| 81  | Ig kappa chain V-V1 region NQ2-17.4.1                                | 0.272966635 |                                                                    |             |
| 82  | Ig kappa chain V-V1 region XRPC 44                                   | 0.272966635 |                                                                    |             |
| 83  | Ig lambda-1 chain C region                                           | 0.272966635 |                                                                    |             |
| 84  | Ig lambda-1 chain V region                                           | 0.093588561 |                                                                    |             |
| 85  | Ig lambda-2 chain V region                                           | 0.027962436 |                                                                    |             |
| 86  | Inhibitor of carbonic anhydrase                                      | 0.033885513 |                                                                    |             |
| 87  | Junction plakoglobin                                                 | 0.079066198 |                                                                    |             |
| 88  | Kallikrein 1-related peptidase b16                                   | 0.090361369 |                                                                    |             |
| 89  | Kallikrein 1-related peptidase b9                                    | 0.054593327 |                                                                    |             |
| 90  | Kallikrein-1                                                         | 0.075065825 |                                                                    |             |
| 91  | Keratin, type I cytoskeletal 13                                      | 0.098267989 |                                                                    |             |
| 92  | Keratin, type I cytoskeletal 17                                      | 0.171834734 |                                                                    |             |
| 93  | Keratin, type I cytoskeletal 42                                      | 0.051993645 |                                                                    |             |
| 94  | Keratin, type II cytoskeletal 1b                                     | 0.051381955 |                                                                    |             |
| 95  | Keratin, type II cytoskeletal 2 oral                                 | 0.005254973 |                                                                    |             |
| 96  | Lactadherin                                                          | 0.005326178 |                                                                    |             |
| 97  | Latent-transforming growth factor beta-binding protein 1             | 0.077072932 |                                                                    |             |
| 98  | Leukemia inhibitory factor receptor                                  | 0.05906819  |                                                                    |             |
| 99  | Lysozyme C-2                                                         | 0.017239998 |                                                                    |             |
| 100 | Macrophage colony-stimulating factor 1                               | 0.052409594 |                                                                    |             |
| 101 | Mannan-binding lectin serine protease 2                              | 0.027296663 |                                                                    |             |
| 102 | Mannose-binding protein A                                            | 0.040944995 |                                                                    |             |
| 103 | Metalloproteinase inhibitor 3                                        | 0.359323352 |                                                                    |             |
| 104 | Multimerin-1                                                         | 0.129404045 |                                                                    |             |
| 105 | Murineoglobulin-1                                                    | 0.269755263 |                                                                    |             |
| 106 | Murineoglobulin-2                                                    | 0.004328986 |                                                                    |             |
| 107 | Myosin light polypeptide 6                                           | 0.030846454 |                                                                    |             |
| 108 | Myosin-11                                                            | 0.114501049 |                                                                    |             |
| 109 | Myosin-4                                                             | 0.030470694 |                                                                    |             |
| 110 | Myosin-9                                                             | 0.036395551 |                                                                    |             |
| 111 | Nucleosome assembly protein 1-like 4                                 | 0.029778178 |                                                                    |             |
| 112 | Peptidyl-prolyl cis-trans isomerase A                                | 0.081009453 |                                                                    |             |
| 113 | Peroxisomaloxin-2                                                    | 0.090988878 |                                                                    |             |
| 114 | Phosphatidylinositol-glycan-specific phospholipase D                 | 0.804010816 |                                                                    |             |
| 115 | Phospholipid transfer protein                                        | 0.053479177 |                                                                    |             |
| 116 | Platelet factor 4                                                    | 0.015414586 |                                                                    |             |
| 117 | Platelet-activating factor acetylhydrolase                           | 0.103439988 |                                                                    |             |
| 118 | Polymeric immunoglobulin receptor                                    | 0.218373308 |                                                                    |             |
| 119 | Prostaglandin H synthase 3                                           | 0.125984601 |                                                                    |             |
| 120 | Proteasome subunit alpha type-1                                      | 0.092588561 |                                                                    |             |
| 121 | Proteasome subunit alpha type-2                                      | 0.146837224 |                                                                    |             |
| 122 | Proteasome subunit alpha type-3                                      | 0.05039384  |                                                                    |             |
| 123 | Proteasome subunit alpha type-4                                      | 0.26690071  |                                                                    |             |
| 124 | Proteasome subunit alpha type-5                                      | 0.187177121 |                                                                    |             |
| 125 | Proteasome subunit alpha type-6                                      | 0.163779981 |                                                                    |             |
| 126 | Proteasome subunit alpha type-7                                      | 0.045180684 |                                                                    |             |
| 127 | Proteasome subunit beta type-1                                       | 0.021837331 |                                                                    |             |
| 128 | Proteasome subunit beta type-10                                      | 0.131023985 |                                                                    |             |

|     |                                                     |             |  |
|-----|-----------------------------------------------------|-------------|--|
| 129 | Proteasome subunit beta type-7                      | 0.085450425 |  |
| 130 | Proteasome subunit beta type-8                      | 0.107304125 |  |
| 131 | Proteasome subunit beta type-9                      | 0.04679428  |  |
| 132 | Pyruvate kinase PKM                                 | 0.038536466 |  |
| 133 | Ras-related protein Rap-1b                          | 0.060102745 |  |
| 134 | Ribonuclease 4                                      | 0.060941388 |  |
| 135 | Sarcoplasmic/endoplasmic reticulum calcium ATPase 1 | 0.738752255 |  |
| 136 | Selenoprotein P                                     | 0.15332594  |  |
| 137 | Serine protease inhibitor A3K                       | 0.072791103 |  |
| 138 | Serine protease inhibitor A3N                       | 0.094716134 |  |
| 139 | SPARC-like protein 1                                | 0.008471378 |  |
| 140 | Sulfhydryl oxidase 1                                | 0.09677908  |  |
| 141 | Tenascin                                            | 0.055206735 |  |
| 142 | Transforming growth factor beta-1                   | 0.119112713 |  |
| 143 | Transitional endoplasmic reticulum ATPase           | 0.059556357 |  |
| 144 | Tropomyosin alpha-1 chain                           | 0.039307195 |  |
| 145 | Tropomyosin beta chain                              | 0.078614391 |  |
| 146 | Tubulin alpha-1B chain                              | 0.176882379 |  |
| 147 | Tubulin beta-1 chain                                | 0.018584962 |  |
| 148 | Tubulin beta-4B chain                               | 0.005599316 |  |
| 149 | Ubiquitin-conjugating enzyme E2                     | 0.042887666 |  |
| 150 | Vinculin                                            | 0.54593327  |  |
| 151 | Zinc-alpha-2-glycoprotein                           | 0.109186654 |  |

**Table S2.** The full list of all the plasma proteins adhering on DOTAP-DSPC-Cholesterol liposomes after 1 h incubation with both MP and HP as identified by NanoLC-MS/MS.
